# Supplementary material for: Pulmonary MicroRNA Changes Alter Angiogenesis in Chronic Obstructive Pulmonary Disease and Lung Cancer
Source: MDPI journal article supplement (doi:10.3390/biomedicines9070830), 2021-07-16
Supplement: s1 [file s1]

# **Pulmonary microRNA changes alter angiogenesis in chronic obstructive pulmonary disease and lung cancer**

CE Green, J Clarke, R Bicknell & AM Turner

**Online Data Supplement**

**A**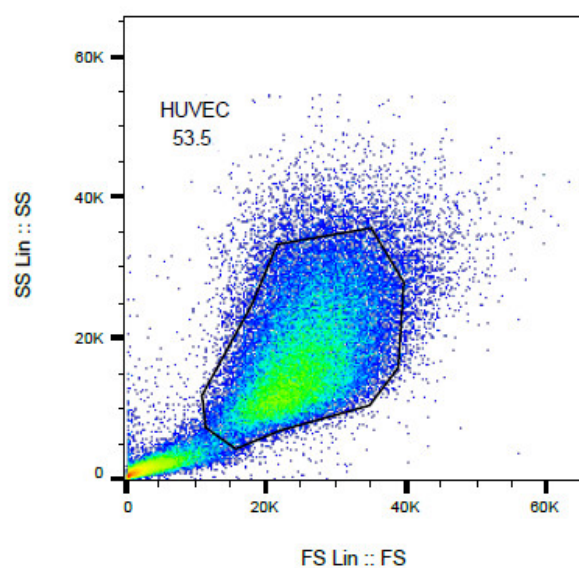**B**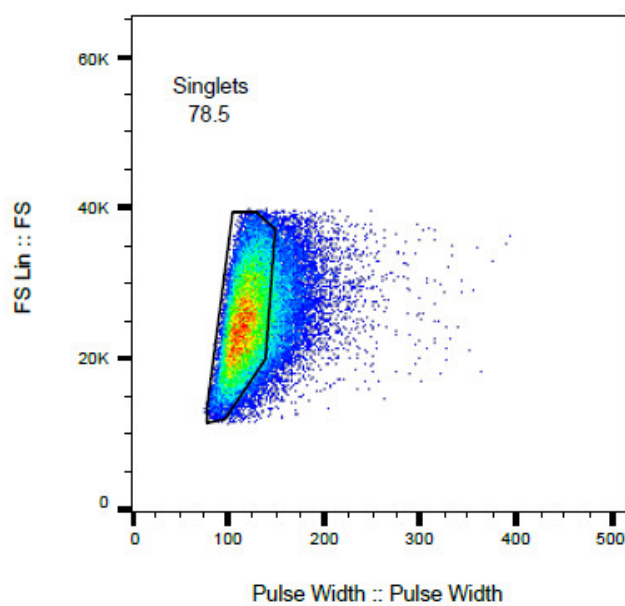

**Figure S1.** Cytogram plots from the program 'FloJo' used for cell cycle analysis. (A): An initial gate was drawn to identify the main cell population. (B): A second gate was drawn to identify single cells within the main cell population. The single cell population was used for cell cycle analysis.

## RESULTS

**Table S1.** Significantly upregulated miR in COPD.

| Gene ID           |                  |                 |                  |
|-------------------|------------------|-----------------|------------------|
| hsa-let-7f-1-3p   | hsa-miR-1264     | hsa-miR-146a-3p | hsa-miR-1914-5p  |
| hsa-let-7f-2-3p   | hsa-miR-1267     | hsa-miR-146a-5p | hsa-miR-193b-3p  |
| hsa-let-7i-3p     | hsa-miR-1269a    | hsa-miR-146b-3p | hsa-miR-193b-5p  |
| hsa-miR-1         | hsa-miR-1269b    | hsa-miR-146b-5p | hsa-miR-196a-3p  |
| hsa-miR-100-5p    | hsa-miR-127-3p   | hsa-miR-1470    | hsa-miR-196b-5p  |
| hsa-miR-103a-2-5p | hsa-miR-1273a    | hsa-miR-148a-3p | hsa-miR-199a-5p  |
| hsa-miR-103b      | hsa-miR-1273d    | hsa-miR-148a-5p | hsa-miR-199b-5p  |
| hsa-miR-105-5p    | hsa-miR-1273g-5p | hsa-miR-148b-3p | hsa-miR-19a-3p   |
| hsa-miR-10a-3p    | hsa-miR-1277-3p  | hsa-miR-148b-5p | hsa-miR-19b-3p   |
| hsa-miR-10b-5p    | hsa-miR-1281     | hsa-miR-149-5p  | hsa-miR-200a-3p  |
| hsa-miR-1178-5p   | hsa-miR-1282     | hsa-miR-150-3p  | hsa-miR-200a-5p  |
| hsa-miR-1184      | hsa-miR-1283     | hsa-miR-152     | hsa-miR-200b-3p  |
| hsa-miR-1185-5p   | hsa-miR-1288     | hsa-miR-153     | hsa-miR-200c-3p  |
| hsa-miR-1200      | hsa-miR-1289     | hsa-miR-1538    | hsa-miR-200c-5p  |
| hsa-miR-1204      | hsa-miR-129-2-3p | hsa-miR-154-3p  | hsa-miR-202-3p   |
| hsa-miR-1206      | hsa-miR-1292-3p  | hsa-miR-154-5p  | hsa-miR-202-5p   |
| hsa-miR-1225-5p   | hsa-miR-1293     | hsa-miR-155-3p  | hsa-miR-203a     |
| hsa-miR-1226-5p   | hsa-miR-1294     | hsa-miR-155-5p  | hsa-miR-203b-3p  |
| hsa-miR-1228-5p   | hsa-miR-1295a    | hsa-miR-16-2-3p | hsa-miR-204-5p   |
| hsa-miR-1229-3p   | hsa-miR-1295b-5p | hsa-miR-17-3p   | hsa-miR-206      |
| hsa-miR-1231      | hsa-miR-1296     | hsa-miR-181a-5p | hsa-miR-208a     |
| hsa-miR-1234-3p   | hsa-miR-1298     | hsa-miR-181b-3p | hsa-miR-208b     |
| hsa-miR-1234-5p   | hsa-miR-1303     | hsa-miR-181c-5p | hsa-miR-20b-3p   |
| hsa-miR-1238-3p   | hsa-miR-1304-5p  | hsa-miR-182-3p  | hsa-miR-21-3p    |
| hsa-miR-1238-5p   | hsa-miR-1306-5p  | hsa-miR-183-5p  | hsa-miR-21-5p    |
| hsa-miR-1245b-3p  | hsa-miR-1307-3p  | hsa-miR-184     | hsa-miR-2110     |
| hsa-miR-1247-5p   | hsa-miR-1307-5p  | hsa-miR-185-3p  | hsa-miR-2114-5p  |
| hsa-miR-1248      | hsa-miR-130a-5p  | hsa-miR-186-3p  | hsa-miR-2115-3p  |
| hsa-miR-1250      | hsa-miR-130b-3p  | hsa-miR-187-3p  | hsa-miR-2115-5p  |
| hsa-miR-1251      | hsa-miR-132-3p   | hsa-miR-188-3p  | hsa-miR-2116-3p  |
| hsa-miR-1252      | hsa-miR-135a-5p  | hsa-miR-18a-3p  | hsa-miR-2117     |
| hsa-miR-1253      | hsa-miR-135b-5p  | hsa-miR-18a-5p  | hsa-miR-212-5p   |
| hsa-miR-1255b-5p  | hsa-miR-136-3p   | hsa-miR-18b-3p  | hsa-miR-216a-3p  |
| hsa-miR-1256      | hsa-miR-136-5p   | hsa-miR-18b-5p  | hsa-miR-216a-5p  |
| hsa-miR-1257      | hsa-miR-138-5p   | hsa-miR-1909-3p | hsa-miR-218-2-3p |
| hsa-miR-125a-5p   | hsa-miR-141-3p   | hsa-miR-190a    | hsa-miR-219-1-3p |
| hsa-miR-125b-2-3p | hsa-miR-141-5p   | hsa-miR-1910    | hsa-miR-219-2-3p |
| hsa-miR-1260a     | hsa-miR-142-3p   | hsa-miR-1911-3p | hsa-miR-22-5p    |
| hsa-miR-1260b     | hsa-miR-142-5p   | hsa-miR-1912    | hsa-miR-221-3p   |
| hsa-miR-1262      | hsa-miR-144-5p   | hsa-miR-1913    | hsa-miR-221-5p   |
| hsa-miR-222-5p    | hsa-miR-3140-5p  | hsa-miR-33a-5p  | hsa-miR-3681-3p  |
| hsa-miR-223-5p    | hsa-miR-3142     | hsa-miR-33b-3p  | hsa-miR-3681-5p  |
| hsa-miR-224-3p    | hsa-miR-3144-3p  | hsa-miR-33b-5p  | hsa-miR-3683     |
| hsa-miR-224-5p    | hsa-miR-3145-3p  | hsa-miR-340-3p  | hsa-miR-3685     |
| hsa-miR-2277-5p   | hsa-miR-3145-5p  | hsa-miR-340-5p  | hsa-miR-3687     |

|                  |                 |                  |                   |
|------------------|-----------------|------------------|-------------------|
| hsa-miR-2355-3p  | hsa-miR-3146    | hsa-miR-342-5p   | hsa-miR-3688-5p   |
| hsa-miR-23c      | hsa-miR-3152-3p | hsa-miR-34a-3p   | hsa-miR-3689a-3p  |
| hsa-miR-2467-5p  | hsa-miR-3152-5p | hsa-miR-34a-5p   | hsa-miR-3689a-5p  |
| hsa-miR-2681-3p  | hsa-miR-3155a   | hsa-miR-34b-5p   | hsa-miR-3689d     |
| hsa-miR-2681-5p  | hsa-miR-3156-3p | hsa-miR-34c-3p   | hsa-miR-3689f     |
| hsa-miR-2682-5p  | hsa-miR-3156-5p | hsa-miR-3529-3p  | hsa-miR-369-3p    |
| hsa-miR-26a-1-3p | hsa-miR-3157-3p | hsa-miR-3591-3p  | hsa-miR-369-5p    |
| hsa-miR-26b-3p   | hsa-miR-3158-5p | hsa-miR-3607-3p  | hsa-miR-3690      |
| hsa-miR-27a-5p   | hsa-miR-3160-5p | hsa-miR-3607-5p  | hsa-miR-3691-5p   |
| hsa-miR-296-3p   | hsa-miR-3161    | hsa-miR-3611     | hsa-miR-3714      |
| hsa-miR-296-5p   | hsa-miR-3166    | hsa-miR-3612     | hsa-miR-371a-3p   |
| hsa-miR-2964a-3p | hsa-miR-3167    | hsa-miR-3613-5p  | hsa-miR-371b-3p   |
| hsa-miR-29b-2-5p | hsa-miR-3173-5p | hsa-miR-3619-3p  | hsa-miR-374a-3p   |
| hsa-miR-29b-3p   | hsa-miR-3175    | hsa-miR-3619-5p  | hsa-miR-374a-5p   |
| hsa-miR-301a-5p  | hsa-miR-3176    | hsa-miR-362-3p   | hsa-miR-374b-3p   |
| hsa-miR-301b     | hsa-miR-3179    | hsa-miR-362-5p   | hsa-miR-374c-3p   |
| hsa-miR-302a-3p  | hsa-miR-3180    | hsa-miR-3620-3p  | hsa-miR-374c-5p   |
| hsa-miR-302a-5p  | hsa-miR-3181    | hsa-miR-3622a-3p | hsa-miR-375       |
| hsa-miR-302b-3p  | hsa-miR-3182    | hsa-miR-363-5p   | hsa-miR-376a-2-5p |
| hsa-miR-302c-3p  | hsa-miR-3183    | hsa-miR-3649     | hsa-miR-376a-3p   |
| hsa-miR-302d-3p  | hsa-miR-3184-5p | hsa-miR-3650     | hsa-miR-376a-5p   |
| hsa-miR-302e     | hsa-miR-3185    | hsa-miR-3651     | hsa-miR-376b-3p   |
| hsa-miR-302f     | hsa-miR-3191-3p | hsa-miR-3652     | hsa-miR-376c-3p   |
| hsa-miR-3064-3p  | hsa-miR-3192    | hsa-miR-3653     | hsa-miR-376c-5p   |
| hsa-miR-3065-5p  | hsa-miR-3193    | hsa-miR-3654     | hsa-miR-377-3p    |
| hsa-miR-3115     | hsa-miR-3197    | hsa-miR-3655     | hsa-miR-377-5p    |
| hsa-miR-3116     | hsa-miR-32-3p   | hsa-miR-3658     | hsa-miR-378a-3p   |
| hsa-miR-3118     | hsa-miR-3200-3p | hsa-miR-3660     | hsa-miR-378a-5p   |
| hsa-miR-3119     | hsa-miR-3200-5p | hsa-miR-3662     | hsa-miR-378d      |
| hsa-miR-3120-5p  | hsa-miR-3201    | hsa-miR-3664-3p  | hsa-miR-378g      |
| hsa-miR-3121-5p  | hsa-miR-320d    | hsa-miR-3669     | hsa-miR-378h      |
| hsa-miR-3123     | hsa-miR-323a-3p | hsa-miR-3670     | hsa-miR-378i      |
| hsa-miR-3124-3p  | hsa-miR-323a-5p | hsa-miR-3671     | hsa-miR-378j      |
| hsa-miR-3124-5p  | hsa-miR-323b-3p | hsa-miR-3674     | hsa-miR-379-3p    |
| hsa-miR-3126-3p  | hsa-miR-323b-5p | hsa-miR-3675-3p  | hsa-miR-379-5p    |
| hsa-miR-3127-3p  | hsa-miR-324-5p  | hsa-miR-3677-3p  | hsa-miR-381-3p    |
| hsa-miR-3129-5p  | hsa-miR-330-5p  | hsa-miR-3677-5p  | hsa-miR-381-5p    |
| hsa-miR-3130-5p  | hsa-miR-331-5p  | hsa-miR-3678-5p  | hsa-miR-382-3p    |
| hsa-miR-3133     | hsa-miR-335-5p  | hsa-miR-3680-3p  | hsa-miR-3908      |
| hsa-miR-3134     | hsa-miR-339-5p  | hsa-miR-3680-5p  | hsa-miR-3910      |
| hsa-miR-3912     | hsa-miR-4301    | hsa-miR-448      | hsa-miR-454-3p    |
| hsa-miR-3913-3p  | hsa-miR-4307    | hsa-miR-4483     | hsa-miR-454-5p    |
| hsa-miR-3914     | hsa-miR-4308    | hsa-miR-4486     | hsa-miR-4540      |
| hsa-miR-3915     | hsa-miR-4312    | hsa-miR-4488     | hsa-miR-4632-3p   |
| hsa-miR-3916     | hsa-miR-4315    | hsa-miR-4489     | hsa-miR-4633-5p   |
| hsa-miR-3920     | hsa-miR-4318    | hsa-miR-4491     | hsa-miR-4636      |
| hsa-miR-3921     | hsa-miR-4319    | hsa-miR-4493     | hsa-miR-4637      |
| hsa-miR-3922-3p  | hsa-miR-432-3p  | hsa-miR-4494     | hsa-miR-4639-3p   |
| hsa-miR-3922-5p  | hsa-miR-4320    | hsa-miR-4498     | hsa-miR-4639-5p   |
| hsa-miR-3924     | hsa-miR-4321    | hsa-miR-449a     | hsa-miR-4641      |
| hsa-miR-3925-3p  | hsa-miR-4322    | hsa-miR-449b-3p  | hsa-miR-4642      |

|                 |                  |                  |                  |
|-----------------|------------------|------------------|------------------|
| hsa-miR-3927-5p | hsa-miR-4323     | hsa-miR-449b-5p  | hsa-miR-4643     |
| hsa-miR-3929    | hsa-miR-4325     | hsa-miR-449c-5p  | hsa-miR-4649-5p  |
| hsa-miR-3936    | hsa-miR-4326     | hsa-miR-4501     | hsa-miR-4650-5p  |
| hsa-miR-3941    | hsa-miR-4329     | hsa-miR-4503     | hsa-miR-4652-5p  |
| hsa-miR-3944-5p | hsa-miR-4330     | hsa-miR-4504     | hsa-miR-4653-5p  |
| hsa-miR-3972    | hsa-miR-4418     | hsa-miR-4506     | hsa-miR-4656     |
| hsa-miR-3973    | hsa-miR-4419b    | hsa-miR-4508     | hsa-miR-4657     |
| hsa-miR-3974    | hsa-miR-4423-5p  | hsa-miR-4509     | hsa-miR-466      |
| hsa-miR-3975    | hsa-miR-4424     | hsa-miR-450a-3p  | hsa-miR-4661-3p  |
| hsa-miR-3978    | hsa-miR-4425     | hsa-miR-450a-5p  | hsa-miR-4662a-3p |
| hsa-miR-409-3p  | hsa-miR-4426     | hsa-miR-450b-3p  | hsa-miR-4662a-5p |
| hsa-miR-411-3p  | hsa-miR-4427     | hsa-miR-450b-5p  | hsa-miR-4662b    |
| hsa-miR-411-5p  | hsa-miR-4429     | hsa-miR-4510     | hsa-miR-4666a-3p |
| hsa-miR-423-3p  | hsa-miR-4432     | hsa-miR-4511     | hsa-miR-4667-3p  |
| hsa-miR-4254    | hsa-miR-4434     | hsa-miR-4512     | hsa-miR-4668-3p  |
| hsa-miR-4258    | hsa-miR-4436b-3p | hsa-miR-4517     | hsa-miR-4671-3p  |
| hsa-miR-4262    | hsa-miR-4438     | hsa-miR-4519     | hsa-miR-4671-5p  |
| hsa-miR-4264    | hsa-miR-4441     | hsa-miR-451b     | hsa-miR-4673     |
| hsa-miR-4270    | hsa-miR-4445-3p  | hsa-miR-452-5p   | hsa-miR-4674     |
| hsa-miR-4272    | hsa-miR-4445-5p  | hsa-miR-4520a-3p | hsa-miR-4675     |
| hsa-miR-4273    | hsa-miR-4446-5p  | hsa-miR-4520b-3p | hsa-miR-4680-3p  |
| hsa-miR-4275    | hsa-miR-4447     | hsa-miR-4521     | hsa-miR-4680-5p  |
| hsa-miR-4276    | hsa-miR-4449     | hsa-miR-4523     | hsa-miR-4682     |
| hsa-miR-4277    | hsa-miR-4450     | hsa-miR-4524a-3p | hsa-miR-4683     |
| hsa-miR-4278    | hsa-miR-4454     | hsa-miR-4524b-3p | hsa-miR-4684-3p  |
| hsa-miR-4281    | hsa-miR-4457     | hsa-miR-4525     | hsa-miR-4686     |
| hsa-miR-4282    | hsa-miR-4460     | hsa-miR-4526     | hsa-miR-4687-5p  |
| hsa-miR-4285    | hsa-miR-4467     | hsa-miR-4527     | hsa-miR-4690-3p  |
| hsa-miR-4287    | hsa-miR-4473     | hsa-miR-4528     | hsa-miR-4693-3p  |
| hsa-miR-4288    | hsa-miR-4474-3p  | hsa-miR-4532     | hsa-miR-4694-5p  |
| hsa-miR-429     | hsa-miR-4474-5p  | hsa-miR-4536-5p  | hsa-miR-4695-3p  |
| hsa-miR-4291    | hsa-miR-4477a    | hsa-miR-4537     | hsa-miR-4697-3p  |
| hsa-miR-4292    | hsa-miR-4477b    | hsa-miR-4538     | hsa-miR-4700-5p  |
| hsa-miR-4293    | hsa-miR-4479     | hsa-miR-4539     | hsa-miR-4701-3p  |
| hsa-miR-4703-5p | hsa-miR-4761-3p  | hsa-miR-488-5p   | hsa-miR-516a-5p  |
| hsa-miR-4704-3p | hsa-miR-4761-5p  | hsa-miR-489      | hsa-miR-517a-3p  |
| hsa-miR-4704-5p | hsa-miR-4762-3p  | hsa-miR-490-5p   | hsa-miR-517c-3p  |
| hsa-miR-4707-3p | hsa-miR-4762-5p  | hsa-miR-491-3p   | hsa-miR-5187-5p  |
| hsa-miR-4708-3p | hsa-miR-4763-3p  | hsa-miR-493-5p   | hsa-miR-5189     |
| hsa-miR-4709-5p | hsa-miR-4763-5p  | hsa-miR-495-3p   | hsa-miR-518b     |
| hsa-miR-4711-5p | hsa-miR-4764-3p  | hsa-miR-497-3p   | hsa-miR-518c-3p  |
| hsa-miR-4712-5p | hsa-miR-4765     | hsa-miR-4999-5p  | hsa-miR-518c-5p  |
| hsa-miR-4713-5p | hsa-miR-4766-3p  | hsa-miR-499a-5p  | hsa-miR-518d-3p  |
| hsa-miR-4714-3p | hsa-miR-4766-5p  | hsa-miR-499b-3p  | hsa-miR-5191     |
| hsa-miR-4714-5p | hsa-miR-4768-5p  | hsa-miR-5000-3p  | hsa-miR-5193     |
| hsa-miR-4715-5p | hsa-miR-4770     | hsa-miR-5000-5p  | hsa-miR-5195-5p  |
| hsa-miR-4717-5p | hsa-miR-4771     | hsa-miR-5001-3p  | hsa-miR-5196-3p  |
| hsa-miR-4718    | hsa-miR-4772-3p  | hsa-miR-5002-5p  | hsa-miR-5197-3p  |
| hsa-miR-4719    | hsa-miR-4772-5p  | hsa-miR-5004-3p  | hsa-miR-519b-3p  |
| hsa-miR-4720-3p | hsa-miR-4776-5p  | hsa-miR-5004-5p  | hsa-miR-519c-3p  |
| hsa-miR-4722-3p | hsa-miR-4777-3p  | hsa-miR-5007-3p  | hsa-miR-519d     |

|                   |                 |                 |                  |
|-------------------|-----------------|-----------------|------------------|
| hsa-miR-4723-3p   | hsa-miR-4777-5p | hsa-miR-5007-5p | hsa-miR-519e-3p  |
| hsa-miR-4725-3p   | hsa-miR-4778-3p | hsa-miR-5008-3p | hsa-miR-520a-3p  |
| hsa-miR-4726-3p   | hsa-miR-4779    | hsa-miR-5009-3p | hsa-miR-520a-5p  |
| hsa-miR-4727-3p   | hsa-miR-4781-3p | hsa-miR-500a-3p | hsa-miR-520b     |
| hsa-miR-4727-5p   | hsa-miR-4781-5p | hsa-miR-5010-5p | hsa-miR-520c-3p  |
| hsa-miR-4728-3p   | hsa-miR-4782-3p | hsa-miR-5011-3p | hsa-miR-520f     |
| hsa-miR-4728-5p   | hsa-miR-4782-5p | hsa-miR-5011-5p | hsa-miR-520h     |
| hsa-miR-4729      | hsa-miR-4783-3p | hsa-miR-502-3p  | hsa-miR-526b-3p  |
| hsa-miR-4731-5p   | hsa-miR-4783-5p | hsa-miR-503-5p  | hsa-miR-532-3p   |
| hsa-miR-4732-3p   | hsa-miR-4789-3p | hsa-miR-505-5p  | hsa-miR-532-5p   |
| hsa-miR-4733-3p   | hsa-miR-4789-5p | hsa-miR-506-3p  | hsa-miR-539-3p   |
| hsa-miR-4733-5p   | hsa-miR-4790-5p | hsa-miR-507     | hsa-miR-539-5p   |
| hsa-miR-4735-3p   | hsa-miR-4795-3p | hsa-miR-5089-3p | hsa-miR-542-3p   |
| hsa-miR-4738-5p   | hsa-miR-4795-5p | hsa-miR-5089-5p | hsa-miR-543      |
| hsa-miR-4740-3p   | hsa-miR-4797-3p | hsa-miR-509-5p  | hsa-miR-544b     |
| hsa-miR-4740-5p   | hsa-miR-4797-5p | hsa-miR-5090    | hsa-miR-545-5p   |
| hsa-miR-4742-5p   | hsa-miR-4798-3p | hsa-miR-5091    | hsa-miR-548aa    |
| hsa-miR-4743-3p   | hsa-miR-4798-5p | hsa-miR-5094    | hsa-miR-548ac    |
| hsa-miR-4744      | hsa-miR-4799-3p | hsa-miR-5095    | hsa-miR-548ad    |
| hsa-miR-4745-3p   | hsa-miR-4799-5p | hsa-miR-511     | hsa-miR-548ae    |
| hsa-miR-4752      | hsa-miR-4802-3p | hsa-miR-512-3p  | hsa-miR-548ah-5p |
| hsa-miR-4753-3p   | hsa-miR-4803    | hsa-miR-512-5p  | hsa-miR-548ai    |
| hsa-miR-4755-3p   | hsa-miR-4804-5p | hsa-miR-513a-3p | hsa-miR-548aj-5p |
| hsa-miR-4755-5p   | hsa-miR-483-3p  | hsa-miR-513c-5p | hsa-miR-548ak    |
| hsa-miR-4756-3p   | hsa-miR-485-3p  | hsa-miR-514a-5p | hsa-miR-548am-5p |
| hsa-miR-4757-3p   | hsa-miR-486-3p  | hsa-miR-514b-3p | hsa-miR-548ao-3p |
| hsa-miR-4757-5p   | hsa-miR-487b    | hsa-miR-514b-5p | hsa-miR-548ao-5p |
| hsa-miR-4760-5p   | hsa-miR-488-3p  | hsa-miR-515-5p  | hsa-miR-548ap-3p |
| hsa-miR-548aq-5p  | hsa-miR-5686    | hsa-miR-6128    | hsa-miR-6514-5p  |
| hsa-miR-548as-3p  | hsa-miR-5688    | hsa-miR-613     | hsa-miR-653      |
| hsa-miR-548at-3p  | hsa-miR-5692b   | hsa-miR-6133    | hsa-miR-654-3p   |
| hsa-miR-548au-3p  | hsa-miR-5692c   | hsa-miR-6134    | hsa-miR-655      |
| hsa-miR-548au-5p  | hsa-miR-5693    | hsa-miR-614     | hsa-miR-656      |
| hsa-miR-548ax     | hsa-miR-5694    | hsa-miR-616-5p  | hsa-miR-657      |
| hsa-miR-548ay-5p  | hsa-miR-5695    | hsa-miR-618     | hsa-miR-658      |
| hsa-miR-548az-3p  | hsa-miR-5697    | hsa-miR-620     | hsa-miR-659-5p   |
| hsa-miR-548az-5p  | hsa-miR-5698    | hsa-miR-624-3p  | hsa-miR-660-3p   |
| hsa-miR-548b-3p   | hsa-miR-570-3p  | hsa-miR-624-5p  | hsa-miR-661      |
| hsa-miR-548b-5p   | hsa-miR-5700    | hsa-miR-626     | hsa-miR-662      |
| hsa-miR-548d-5p   | hsa-miR-5704    | hsa-miR-627     | hsa-miR-664a-3p  |
| hsa-miR-548e      | hsa-miR-5705    | hsa-miR-628-3p  | hsa-miR-664b-3p  |
| hsa-miR-548f      | hsa-miR-5706    | hsa-miR-628-5p  | hsa-miR-668      |
| hsa-miR-548g-3p   | hsa-miR-5707    | hsa-miR-632     | hsa-miR-671-3p   |
| hsa-miR-548j      | hsa-miR-571     | hsa-miR-633     | hsa-miR-6715a-3p |
| hsa-miR-548k      | hsa-miR-573     | hsa-miR-634     | hsa-miR-6715b-3p |
| hsa-miR-548n      | hsa-miR-576-3p  | hsa-miR-635     | hsa-miR-6716-3p  |
| hsa-miR-548p      | hsa-miR-578     | hsa-miR-636     | hsa-miR-6717-5p  |
| hsa-miR-548t-5p   | hsa-miR-580     | hsa-miR-637     | hsa-miR-6721-5p  |
| hsa-miR-548u      | hsa-miR-582-3p  | hsa-miR-641     | hsa-miR-6722-5p  |
| hsa-miR-549a      | hsa-miR-582-5p  | hsa-miR-642a-5p | hsa-miR-675-3p   |
| hsa-miR-550b-2-5p | hsa-miR-584-3p  | hsa-miR-642b-5p | hsa-miR-675-5p   |

|                 |                |                  |                  |
|-----------------|----------------|------------------|------------------|
| hsa-miR-550b-3p | hsa-miR-585    | hsa-miR-643      | hsa-miR-676-3p   |
| hsa-miR-553     | hsa-miR-588    | hsa-miR-644a     | hsa-miR-7-1-3p   |
| hsa-miR-554     | hsa-miR-589-3p | hsa-miR-645      | hsa-miR-7-2-3p   |
| hsa-miR-556-3p  | hsa-miR-589-5p | hsa-miR-647      | hsa-miR-708-5p   |
| hsa-miR-5579-5p | hsa-miR-590-5p | hsa-miR-649      | hsa-miR-758-3p   |
| hsa-miR-5580-3p | hsa-miR-591    | hsa-miR-6499-5p  | hsa-miR-759      |
| hsa-miR-5582-3p | hsa-miR-593-3p | hsa-miR-650      | hsa-miR-761      |
| hsa-miR-5583-5p | hsa-miR-595    | hsa-miR-6500-5p  | hsa-miR-764      |
| hsa-miR-5589-3p | hsa-miR-597    | hsa-miR-6501-5p  | hsa-miR-766-5p   |
| hsa-miR-5589-5p | hsa-miR-599    | hsa-miR-6502-5p  | hsa-miR-769-5p   |
| hsa-miR-5590-5p | hsa-miR-603    | hsa-miR-6503-3p  | hsa-miR-877-3p   |
| hsa-miR-5591-5p | hsa-miR-605    | hsa-miR-6503-5p  | hsa-miR-877-5p   |
| hsa-miR-561-3p  | hsa-miR-606    | hsa-miR-6504-3p  | hsa-miR-885-3p   |
| hsa-miR-561-5p  | hsa-miR-6075   | hsa-miR-6504-5p  | hsa-miR-888-5p   |
| hsa-miR-563     | hsa-miR-6078   | hsa-miR-6505-5p  | hsa-miR-890      |
| hsa-miR-566     | hsa-miR-6082   | hsa-miR-6506-3p  | hsa-miR-891a     |
| hsa-miR-567     | hsa-miR-6084   | hsa-miR-6506-5p  | hsa-miR-892c-5p  |
| hsa-miR-568     | hsa-miR-6085   | hsa-miR-6507-3p  | hsa-miR-9-3p     |
| hsa-miR-5680    | hsa-miR-6086   | hsa-miR-6509-5p  | hsa-miR-921      |
| hsa-miR-5681a   | hsa-miR-609    | hsa-miR-6511a-3p | hsa-miR-92a-1-5p |
| hsa-miR-5681b   | hsa-miR-611    | hsa-miR-6512-3p  | hsa-miR-92b-5p   |
| hsa-miR-5684    | hsa-miR-612    | hsa-miR-6513-5p  | hsa-miR-937-3p   |
| hsa-miR-938     | hsa-miR-941    | hsa-miR-943      | hsa-miR-944      |

This table demonstrates the miR that were significantly upregulated in COPD vs non-COPD in the miR microarray analyses.

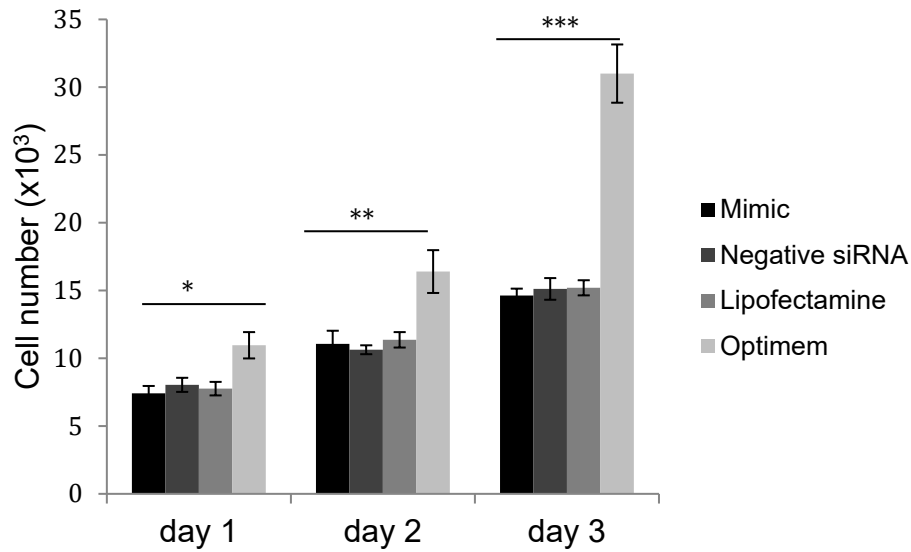

**Figure S2.** Cell growth assay. This figure shows the number of cells day 1, 2 and 3 after transfection in cells transfected with miR mimic, negative siRNA, lipofectamine or optimum. Numbers represent the mean from three separate experiments. There was no significant difference between mimic and negative siRNA groups suggesting that the miR mimic did not affect cell growth. The Kruskal-Wallis test was used to determine significant differences between groups.  $n = 3$  in each group. Day 1;  $p = 0.046$ , day 2;  $p = 0.001$ , day 3;  $op < 0.001$ . \* =  $p < 0.05$ , \*\* =  $p < 0.01$ , \*\*\* =  $p < 0.001$ .

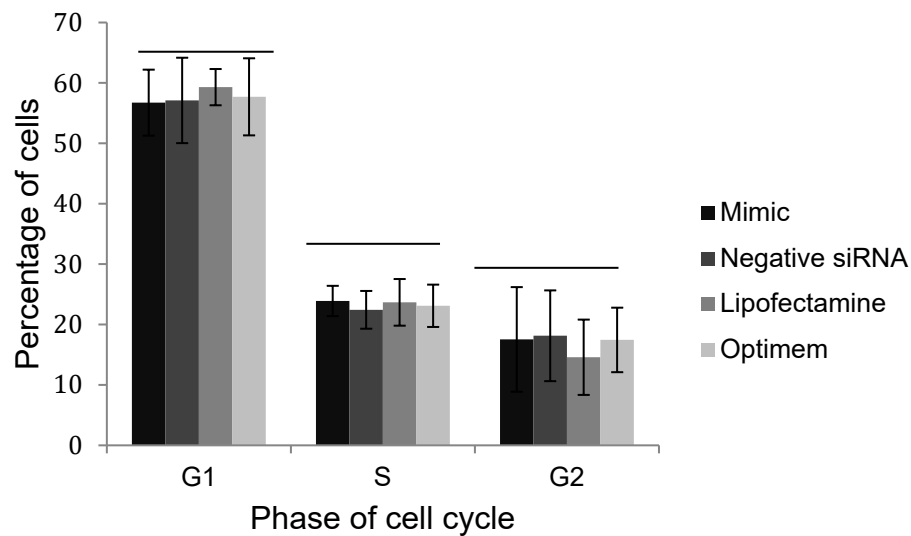

**Figure S3.** Cell cycle analysis according to flow cytometry. The figure shows the proportion of cells in G1, S and G2 phases of the cell cycle in cells transfected with miR mimic, negative siRNA, lipofectamine or optimum. The values represent the mean from three separate experiments. There was no significant difference between mimic and negative siRNA groups suggesting that the miR mimic did not affect the cell cycle. A one-way ANOVA test was used to determine significant differences between groups. Tukey's test was used post-hoc to look for significant differences between individual groups. There were no significant differences detected.  $n = 3$  in each group.



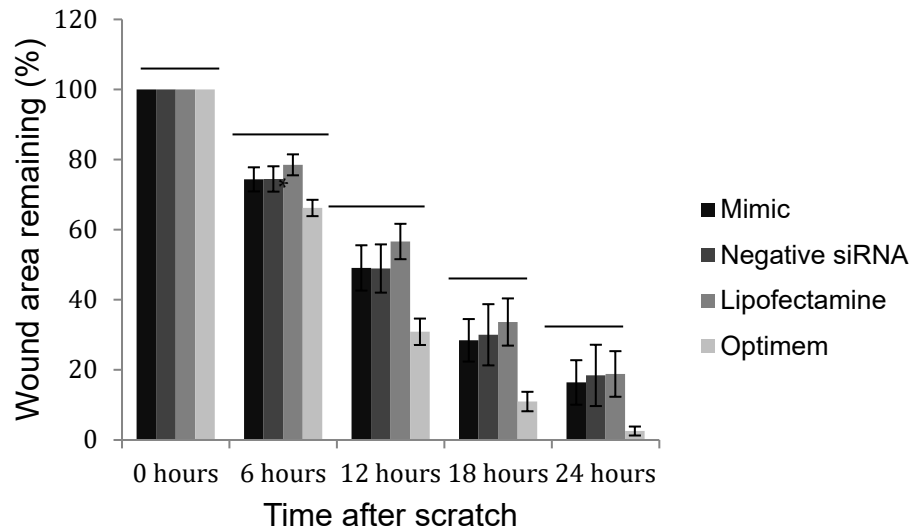

**Figure S4.** Percentage wound area remaining during scratch wound assay using a miR-181b-3p mimic. The average percentage wound remaining for each condition is recorded at 0, 6, 12, 18 and 24 h. The data represents the mean from three separate experiments. An ANOVA test was used to look for significance between groups.  $p = 0.021$  at 12 h.  $* = p < 0.05$  (ANOVA). A Tukey's test demonstrated that there was no significant difference between the mimic and negative siRNA groups suggesting that miR-181b-3p does not affect wound adhesion.

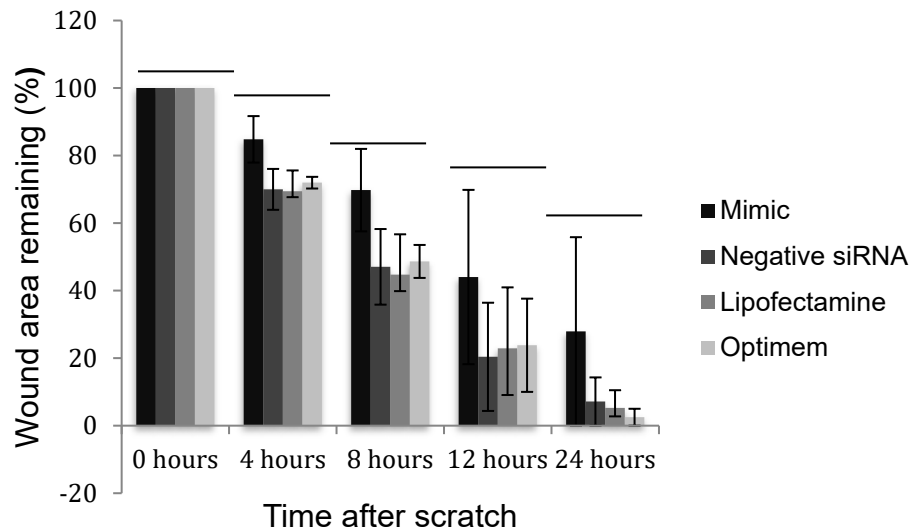

**Figure S5.** Percentage wound area remaining during scratch wound assay using a miR-429 mimic. The average percentage wound remaining for each condition is recorded at 0, 4, 8, 12 and 24 h. The data represents the mean from three separate experiments. An ANOVA test was used to look for significance between groups. A Tukey's test demonstrated that there was no significant difference between the mimic and negative siRNA groups suggesting that miR-429 does not affect wound adhesion.

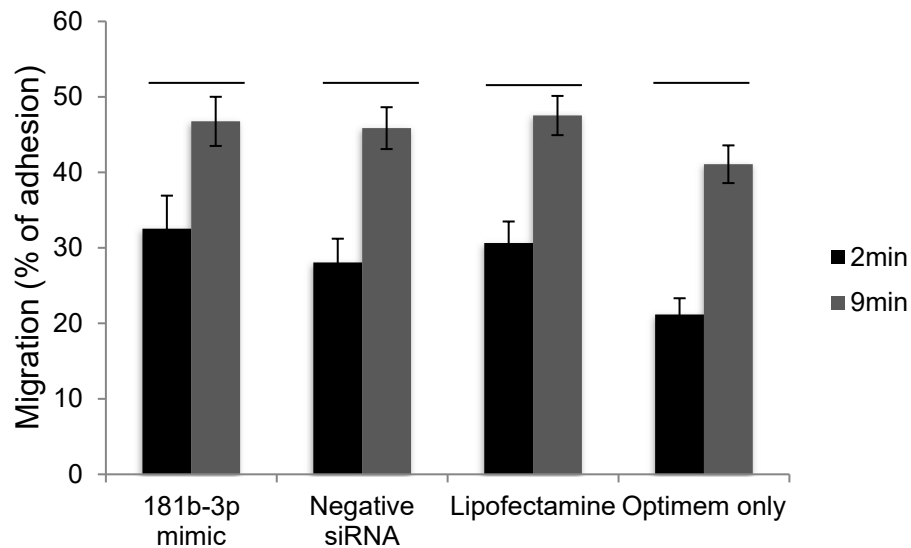

**Figure S6.** Static transendothelial study investigating miR-181b-3p. This chart shows the proportion of cells that have migrated during the assay at 2 and 9 min. The data represents the mean from three separate experiments. An ANOVA test was used to look for significance between groups. A Tukey's test demonstrated that there was no significant difference between the mimic and negative siRNA groups suggesting that miR-181b-3p does not affect neutrophil transmigration across pulmonary endothelium.

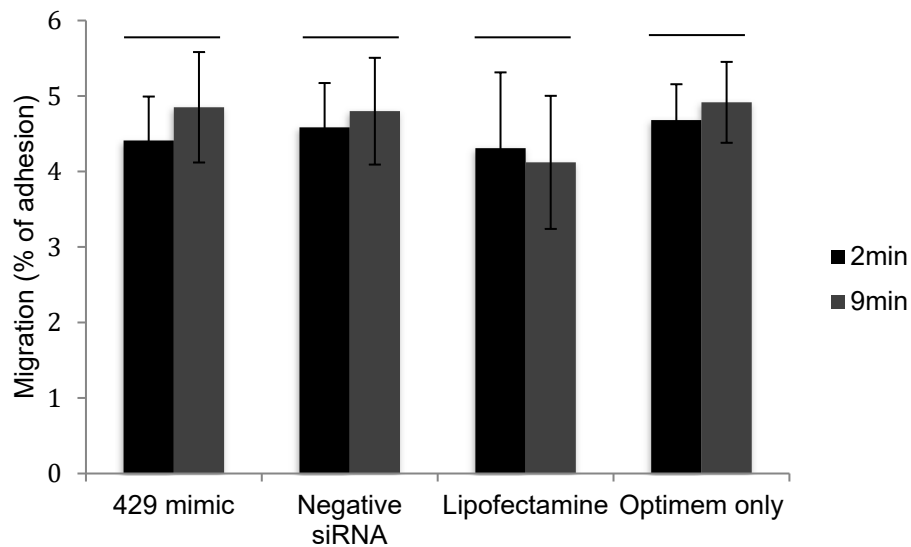

**Figure S7:** Static transendothelial study investigating miR-429. This chart shows the proportion of cells that have migrated during the assay at 2 and 9 min. The data represents the mean from three separate experiments. An ANOVA test was used to look for significance between groups. A Tukey's test demonstrated that there was no significant difference between the mimic and negative siRNA groups suggesting that miR-429 does not affect neutrophil transmigration across pulmonary endothelium.
